# Supplementary material for: Metabolic Profiles of Whole Serum and Serum-Derived Exosomes Are Different in Head and Neck Cancer Patients Treated by Radiotherapy
Source: J Pers Med. 2020 Nov 13;10(4):229. doi: 10.3390/jpm10040229 (PMC7711528; doi:10.3390/jpm10040229)
Supplement: Supplementary file 1 [file jpm-10-00229-s001.xlsx]

## Sheet: Table S1
Table S1: Metabolites identified in human serum and serum-derived exosomes .
No	Average Rt (min)	Mass	Metabolite name	HMDB	Class	Presence (B—both; S—serum; Ex—exosomes)	Serum sample A	Serum sample B	Serum sample C	Serum—significance of differences between A and C (RBCC effect size)	Serum—significance of differences between A and B (RBCC effect size)	EVs sample A	EVs sample B	EVs sample C	EVs—significance of differences between A and C (Cohen's d effect size)	EVs—significance of differences between A and B (Cohen's d effect size)
4	7.073	133	Hydroxylamine	HMDB0003338	Amines	B	3.62787e-05	0.00569071	0.0033007	-0.24	-0.583472	0.00149043	0.000635491	0.00213069	0.28	0.237496
10	7.443	73	Dihydrouracil	HMDB0000076	Pyrimidine nucleosides	B	0.000801115	0.0214682	0.0223041	-0.38	0.22106	0.002528	0.00550407	0.0028487	0.12	-0.168225
13	7.494	147	Hydroxypropionic acid	HMDB0000700	Hydroxy acids	B	0.000327407	0.00241451	0.000208773	-0.3	-0.314415	0.000181597	0.000134179	0.000292024	0	0.232473
15	7.732	147	3-Hydroxybutyric acid	HMDB0000357	Hydroxy acids	B	1.805e-05	0.00396781	0.00145539	-0.04	-0.169875	0.000299378	5.078e-05	0.00021997	0	0.331364
33	9.055	105	Benzoic acid	HMDB0001870	Carboxylic acids	B	3.1666e-06	0.000128916	0.000147143	-0.22	0.283374	4.665e-05	5.12198e-05	0.000241387	0	-0.0782652
39	9.379	73	Glycerol	HMDB0000131	Sugar alcohols	B	4.949e-06	0.0107657	0.0119458	-0.38	0.3424	0.0874639	0.0499473	0.0769333	0.22	0.555246
40	9.38	299	Phosphate	HMDB0001429	Inorganic acids	B	1.534e-05	0.0125419	0.0164495	-0.54	0.182721	0.593331	0.567344	0.449826	0.12	0.107403
45	9.942	147	Malonic acid	HMDB0000691	Carboxylic acids	B	8.59157e-05	0.00102997	0.00098871	0.02	0.01	2.0861e-05	4.02015e-05	0.000414307	0	-0.265189
46	9.981	147	Succinic acid	HMDB0000254	Carboxylic acids	B	6.44325e-05	0.000760236	0.000650827	-0.06	0.03	2.1306e-05	3.63086e-05	0.00022216	-0.4	-0.328313
47	10.184	147	Glyceric acid	HMDB0000139	Sugar acids	B	1.786e-05	0.00019069	0.000173221	0.36	-0.04	1.5408e-05	0.000104129	0.00012181	-0.3	-0.313341
52	10.647	117	Nonanoic acid	HMDB0000847	Fatty acids	B	2.739e-05	0.000200217	0.000267411	-0.56	0.335781	3.42538e-05	4.90371e-05	0.000142148	-0.06	-0.244414
60	11.533	174	L-Alanine	HMDB0000161	Amino acids	B	0.00211015	0.0177942	0.0207653	-0.48	0.281247	0.00172944	0.000106016	0.000533534	0.06	0.381412
70	12.529	147	D-Threitol	HMDB0004136	Sugar alcohols	B	0.00080959	0.000184648	0.000287681	-0.64	0.388888	4.83e-06	1.4093e-05	8.11567e-05	0	-0.335889
79	13.334	243	Dodecanol	HMDB0011626	Fatty alcohols	B	1.3426e-06	7.45235e-05	6.005e-05	0.4	0.309222	0.000559868	4.4478e-05	3.95236e-05	0.23	0.313557
92	14.322	117	Dodecanoic acid	HMDB0000638	Fatty acids	B	0.0111616	0.000433186	0.000479135	-0.09	0.147199	1.0538e-05	9.7626e-06	6.03141e-05	0.1	0.0337124
102	15.038	217	Ribitol	HMDB0000508	Sugar alcohols	B	7.628e-06	0.000245902	0.000312992	-0.36	0.105553	3.8472e-05	0.000127419	0.000752369	0	-0.303541
114	16.124	147	Citric acid	HMDB0000094	Carboxylic acids	B	5.705e-05	0.001506	0.00192892	-0.48	0.149562	8.581e-06	5.33524e-05	0.000322079	-0.54	-0.319231
122	16.486	117	Myristic acid	HMDB0000806	Fatty acids	B	0.000117803	0.00376064	0.00318401	0.82	0.172123	1.3268e-05	1.94534e-05	5.18031e-05	0	-0.138196
124	16.607	147	D-Pinitol	HMDB0034219	Sugar alcohols	B	0.00974873	8.76694e-05	8.99909e-05	-0.08	0.284303	6.376e-06	2.19019e-05	8.3544e-05	-0.24	-0.294397
126	16.676	103	D-Fructose	HMDB0000660	Saccharides	B	1.155e-05	0.00105251	0.0012056	-0.26	0.178761	3.6477e-05	0.000136634	0.000680032	-0.06	-0.290531
132	17.284	73	L-Iditol	HMDB0011632	Amino acids	B	3.4274e-06	0.00566186	0.00276058	0.16	-0.302895	2.7636e-05	7.961e-05	0.000654994	-0.28	-0.408692
140	17.634	299	1-Hexadecanol	HMDB0003424	Fatty alcohols	B	9.5576e-05	6.217e-05	6.341e-05	0	0.05	5.81211e-05	3.25e-05	3.118e-05	0.52	0.309305
141	17.691	319	D-Glucose	HMDB0000122	Saccharides	B	0.000353248	0.0767125	0.0700144	0.08	-0.746435	2.2087e-05	8.45929e-05	0.00038339	0	-0.2901
148	18.479	117	Palmitic acid	HMDB0000220	Fatty acids	B	0.0218938	0.0392987	0.0372576	-0.26	-0.397196	7.01595e-05	9.35002e-05	0.000446656	-0.2	-0.118024
151	18.857	217	Myo-Inositol	HMDB0000211	Sugar alcohols	B	0.00100568	0.00544232	0.00605828	-0.4	0.365496	1.2658e-05	5.05092e-05	0.000404533	-0.48	-0.299783
160	19.984	73	Linoleic acid	HMDB0000673	Fatty acids	B	1.354e-05	0.00379509	0.00195638	0.48	0.105668	1.4735e-05	6.75225e-05	0.000308276	-0.35	-0.30175
163	20.052	73	Oleic acid	HMDB0000207	Fatty acids	B	0.000210098	0.00449045	0.00231426	0.42	-0.384468	1.7799e-05	7.57122e-05	0.000336131	-0.26	-0.29737
164	20.297	73	Stearic acid	HMDB0000827	Fatty acids	B	0.0101726	0.0178203	0.0197522	-0.1	0.25	2.8412e-05	8.34714e-05	0.000340645	-0.2	-0.267496
180	23.108	147	Glycerol 1-hexadecanoate	HMDB0031074	Glycerolipids	B	0.000169735	7.73331e-05	7.37324e-05	-0.04	0.01	1.4123e-05	3.08481e-05	0.00019784	0	0
183	23.466	147	Sucrose	HMDB0000258	Saccharides	B	0.00611136	0.000771367	0.000259468	-0.32	-0.485889	4.4115e-05	0.000160162	0.000706506	-0.26	-0.286594
187	24.378	129	MG(18:1(9Z)/0:0/0:0)	HMDB0011567	Glycerolipids	B	2.41e-05	4.53e-05	3.1433e-05	0.6	0.32	1.97976e-05	2.43285e-05	0.000133732	0.12	-0.0796178
191	24.852	55	beta-Sitosterol	HMDB0000852	Sterols	B	0.000770792	6.62427e-05	3.9e-05	-0.11	-0.580049	6.556e-06	4.66484e-05	0.000225334	-0.28	-0.317252
195	28.92	129	Cholesterol	HMDB0000067	Sterols	B	2.1476e-07	0.0122053	0.0122288	-0.3	-0.302418	0.000857095	0.000429471	0.000511364	0.22	0.484245
3	6.452	117	Propylene glycol	HMDB0001881	Others	Ex	n.d.	n.d.	n.d.	-	-	2.894e-05	5.19161e-05	0.000196035	-0.52	-0.247209
5	7.141	120	N,N-Dimethylaniline	HMDB0001020	Amines	Ex	n.d.	n.d.	n.d.	-	-	0.00015255	1.38941e-05	6.1498e-05	0.1	0.370487
8	7.326	75	1,1-Dimethoxyheptane	HMDB0040432	Others	Ex	n.d.	n.d.	n.d.	-	-	2.715e-05	0.000141353	0.00045075	-0.44	-0.326767
19	7.891	117	Heptanoic acid	HMDB0000666	Fatty acids	Ex	n.d.	n.d.	n.d.	-	-	4.23828e-05	6.90544e-05	0.000151481	0	-0.320875
32	9.028	100	Oxoadipic acid	HMDB0000225	Keto acids	Ex	n.d.	n.d.	n.d.	-	-	1.3501e-05	2.212e-05	0.000405299	-0.14	-0.257819
36	9.303	129	Paramethadione	HMDB0014755	Others	Ex	n.d.	n.d.	n.d.	-	-	9.062e-06	5.61109e-05	0.00128468	-0.18	-0.329095
57	11.289	234	2,3-Diphosphoglyceric acid	HMDB0001294	Sugar acids	Ex	n.d.	n.d.	n.d.	-	-	4.36744e-05	7.3455e-06	8.69258e-06	0.24	0.324376
64	12.073	73	3-Cresotinic acid	HMDB0002390	Carboxylic acids	Ex	n.d.	n.d.	n.d.	-	-	0.000183296	0.000751928	0.00245187	-0.2	-0.288199
90	14.171	223	4-Hydroxybenzoic acid	HMDB0000500	Carboxylic acids	Ex	n.d.	n.d.	n.d.	-	-	8.045e-07	7.0175e-06	2.60634e-05	-0.66	-0.350016
99	14.858	204	Levoglucosan	HMDB0000640	Saccharides	Ex	n.d.	n.d.	n.d.	-	-	6.873e-06	7.75095e-06	9.44438e-05	0.36	-0.0721971
106	15.573	217	Glucose 1-phosphate	HMDB0001586	Glycerolipids	Ex	n.d.	n.d.	n.d.	-	-	2.3843e-06	8.995e-06	8.46484e-05	-0.15	-0.295126
162	19.999	95	L-Borneol	HMDB0034976	Amino acids	Ex	n.d.	n.d.	n.d.	-	-	4.658e-06	2.33373e-05	0.000138739	0	-0.297765
177	22.821	383	Docosanol	HMDB0014770	Fatty alcohols	Ex	n.d.	n.d.	n.d.	-	-	1.19007e-05	7.70475e-06	5.06598e-06	0.34	0.112565
1	6.138	151	Phenol	HMDB0000228	Phenols	S	6.091e-06	9.0276e-05	2.54025e-05	0.05	-0.505751	n.d.	n.d.	n.d.	-	-
2	6.187	117	L-Lactic acid	HMDB0000190	Hydroxy acids	S	0.000150093	0.0447514	0.0462724	0.1	0.03	n.d.	n.d.	n.d.	-	-
6	7.209	73	Alpha-Hydroxyisobutyric acid	HMDB0000729	Hydroxy acids	S	0.000232472	0.00275571	0.00179788	0.04	-0.391425	n.d.	n.d.	n.d.	-	-
7	7.321	147	Glycolic acid	HMDB0000115	Hydroxy acids	S	0.000861405	0.001132	0.000812817	-0.08	-0.155186	n.d.	n.d.	n.d.	-	-
9	7.329	89	Alpha-ketoisovaleric acid	HMDB0000019	Keto acids	S	0.045288	0.000243557	0.000104274	0	-0.255818	n.d.	n.d.	n.d.	-	-
11	7.451	73	Oxalic acid	HMDB0002329	Carboxylic acids	S	7.75079e-05	0.0236972	0.0246744	-0.62	-0.338375	n.d.	n.d.	n.d.	-	-
12	7.491	156	2-Piperidinone	HMDB0011749	Others	S	0.00157156	2.3235e-05	4.43217e-05	-0.1	0.0604055	n.d.	n.d.	n.d.	-	-
14	7.646	165	Benzyl alcohol	HMDB0003119	Others	S	7.983e-06	0.000317486	0.000149004	-0.48	-0.571832	n.d.	n.d.	n.d.	-	-
16	7.734	147	Sulfate	HMDB0001448	Inorganic acids	S	4.421e-05	0.00631981	0.0028925	0.08	-0.0747781	n.d.	n.d.	n.d.	-	-
17	7.778	145	2-Hydroxy-2-methylbutyric acid	HMDB0001987	Hydroxy fatty acids	S	3.06e-05	0.000465346	0.000716943	-0.28	0.297668	n.d.	n.d.	n.d.	-	-
18	7.806	201	2-Ethylhexanoic acid	HMDB0031230	Fatty acids	S	0.000570865	0.000108443	0.000251152	-0.74	0.0672199	n.d.	n.d.	n.d.	-	-
20	7.973	130	N-Methylalanine	HMDB0094692	Amino acids	S	3.2951e-05	0.00383395	0.00417463	-0.42	-0.543342	n.d.	n.d.	n.d.	-	-
21	8.076	131	2-Hydroxyvaleric acid	HMDB0001863	Hydroxy fatty acids	S	0.00032439	0.000355891	0.000670357	-0.29	-0.403099	n.d.	n.d.	n.d.	-	-
22	8.211	102	Beta-Alanine	HMDB0000056	Amino acids	S	0.000158972	7.52539e-05	0.000126514	-0.24	0.377171	n.d.	n.d.	n.d.	-	-
23	8.285	73	Sarcosine	HMDB0000271	Amino acids	S	0.000307407	0.000293523	0.000370956	-0.46	-0.146996	n.d.	n.d.	n.d.	-	-
24	8.299	73	3-Methyl-2-oxovaleric acid	HMDB0000491	Keto acids	S	1.5495e-06	0.000363627	0.00040676	-0.48	-0.321481	n.d.	n.d.	n.d.	-	-
25	8.475	147	3-Hydroxyisovaleric acid	HMDB0000754	Hydroxy fatty acids	S	4.4818e-06	0.000154181	0.000194701	0.06	0.553546	n.d.	n.d.	n.d.	-	-
26	8.514	89	Ketoleucine	HMDB0000695	Keto acids	S	6.875e-06	0.000136845	0.000179282	-0.46	-0.172893	n.d.	n.d.	n.d.	-	-
27	8.558	73	L-Valine	HMDB0000883	Amino acids	S	4.849e-05	0.00930593	0.010502	-0.3	0.375551	n.d.	n.d.	n.d.	-	-
28	8.967	147	Maleic acid	HMDB0000176	Carboxylic acids	S	9.493e-06	0.0208218	0.0228969	-0.38	0.293188	n.d.	n.d.	n.d.	-	-
29	8.992	147	Methylmalonic acid	HMDB0000202	Carboxylic acids	S	2.043e-05	0.0202809	0.0229915	-0.38	0.232	n.d.	n.d.	n.d.	-	-
30	8.997	73	Dihydroxyacetone (dimer)	HMDB0032222	Others	S	2.688e-05	0.00969513	0.0105796	-0.12	0.345706	n.d.	n.d.	n.d.	-	-
31	9.007	147	Urea	HMDB0000294	Others	S	0.000181292	0.0476051	0.0596333	-0.26	0.96	n.d.	n.d.	n.d.	-	-
34	9.293	117	Caprylic acid	HMDB0000482	Fatty acids	S	2.453e-06	8.93736e-05	0.000119444	-0.48	0.50563	n.d.	n.d.	n.d.	-	-
35	9.301	73	Ethanolamine	HMDB0000149	Amines	S	2.64057e-06	0.000229333	0.000208613	-0.02	-0.242545	n.d.	n.d.	n.d.	-	-
37	9.374	158	L-Leucine	HMDB0000687	Amino acids	S	3.366e-05	0.010814	0.0107788	-0.24	-0.195172	n.d.	n.d.	n.d.	-	-
38	9.375	299	Pyrophosphate	HMDB0000250	Inorganic acids	S	2.64057e-06	0.000229333	0.000208613	0.3	-0.588868	n.d.	n.d.	n.d.	-	-
41	9.513	147	Ethylmalonic acid	HMDB0000622	Fatty acids	S	0.000194462	2.1468e-05	3.10413e-05	-0.28	0.111222	n.d.	n.d.	n.d.	-	-
42	9.682	158	L-Isoleucine	HMDB0000172	Amino acids	S	4.0182e-08	0.00293775	0.00329535	-0.52	-0.359944	n.d.	n.d.	n.d.	-	-
43	9.751	142	L-Proline	HMDB0000162	Amino acids	S	2.21291e-05	0.0270643	0.0358518	-0.36	0.566096	n.d.	n.d.	n.d.	-	-
44	9.869	102	Glycine	HMDB0000123	Amino acids	S	5.76226e-05	0.00873197	0.00872416	0.48	0.379574	n.d.	n.d.	n.d.	-	-
48	10.359	117	4-Deoxyerythronic acid	HMDB0000498	Sugar acids	S	0.00527287	2.77e-05	5e-05	-0.22	0.852873	n.d.	n.d.	n.d.	-	-
49	10.486	73	Beta-Aminopropionitrile	HMDB0004101	Others	S	4.523e-06	0.000213159	0.000191382	-0.14	-0.2236	n.d.	n.d.	n.d.	-	-
50	10.604	73	O-Acetylserine	HMDB0003011	Amino acids	S	0.00293963	0.00463144	0.00360009	0.58	-0.308471	n.d.	n.d.	n.d.	-	-
51	10.64	204	L-Serine	HMDB0000187	Amino acids	S	0.000469786	0.00818831	0.0060724	0.6	0	n.d.	n.d.	n.d.	-	-
53	10.688	73	Cyclo-Leucine	HMDB0062225	Amino acids	S	0.0207968	0.00013378	9.44769e-05	0.4	0.125472	n.d.	n.d.	n.d.	-	-
54	10.785	147	Erythrono-1,4-lactone	HMDB0000349	Lactones	S	0.000534928	5.021e-05	0.000139853	-0.44	0.756698	n.d.	n.d.	n.d.	-	-
55	10.869	147	N-Formylglycine	CID75606	Amino acids	S	0.00444925	0.000145268	0.000264881	0.3	0.292744	n.d.	n.d.	n.d.	-	-
56	10.95	73	L-Threonine	HMDB0000167	Amino acids	S	0.000115233	0.00459732	0.00526958	-0.22	0.23869	n.d.	n.d.	n.d.	-	-
58	11.422	104	Hydrocinnamic acid	HMDB0000764	Carboxylic acids	S	3.176e-05	1.3881e-05	3.0323e-05	-0.03	0.182882	n.d.	n.d.	n.d.	-	-
59	11.436	73	Diethanolamine	HMDB0004437	Amines	S	2.64057e-06	0.00013662	0.000160978	-0.2	0.155688	n.d.	n.d.	n.d.	-	-
61	11.56	174	3-Aminoisobutanoic acid	HMDB0003911	Carboxylic acids	S	0.0021324	0.000246061	0.000214764	0.06	-0.281136	n.d.	n.d.	n.d.	-	-
62	11.936	117	Decanoic acid	HMDB0000511	Fatty acids	S	0.000153664	0.000107222	0.000146565	-0.42	0.646809	n.d.	n.d.	n.d.	-	-
63	12.054	147	Aminomalonic acid	HMDB0001147	Carboxylic acids	S	2.0996e-05	0.00099111	0.00104135	0.16	0.246307	n.d.	n.d.	n.d.	-	-
65	12.099	218	L-Homoserine	HMDB0000719	Amino acids	S	0.000257077	0.000623474	0.000586224	-0.12	-0.178544	n.d.	n.d.	n.d.	-	-
66	12.159	147	2-ketoglucose dimethylacetal	NA	Others	S	1.7191e-05	7.86297e-05	0.000245555	-0.14	0.847494	n.d.	n.d.	n.d.	-	-
67	12.287	73	L-Malic acid	HMDB0000156	Hydroxy acids	S	4.308e-05	0.00014233	0.000136008	-0.14	-0.309995	n.d.	n.d.	n.d.	-	-
68	12.301	91	2-Benzyl imidazoline	NA	Others	S	0.000147143	3.39e-05	3.201e-05	0.07	-0.331402	n.d.	n.d.	n.d.	-	-
69	12.376	57	Octyl 2-methylbutyrate	HMDB36219	Fatty alcohols	S	0.000106809	0.00143131	0.001255	0.2	-0.612314	n.d.	n.d.	n.d.	-	-
71	12.572	267	Salicylic acid	HMDB0001895	Carboxylic acids	S	0.0232658	8.299e-06	0.000843613	-0.92	-0.24346	n.d.	n.d.	n.d.	-	-
72	12.694	232	L-Aspartic acid	HMDB0000191	Amino acids	S	5.572e-05	0.0019564	0.00132154	0.52	0.0592649	n.d.	n.d.	n.d.	-	-
74	12.705	73	L-Methionine	HMDB0000696	Amino acids	S	0.00240414	0.0061921	0.00539363	0.16	-0.75226	n.d.	n.d.	n.d.	-	-
73	12.705	73	Pyroglutamic acid	HMDB0000267	Amino acids	S	0.0207804	0.00619231	0.00539473	0.16	-0.75265	n.d.	n.d.	n.d.	-	-
75	12.772	230	4-Hydroxyproline	HMDB0000725	Amino acids	S	0.00018232	0.000704791	0.000915929	0.22	0.562668	n.d.	n.d.	n.d.	-	-
76	12.864	238	4-Aminophenol	HMDB0001169	Phenols	S	0.00217301	1.45185e-05	1.0031e-06	0.36	-0.394494	n.d.	n.d.	n.d.	-	-
77	13.167	147	Threonic acid	HMDB0000943	Amino acids	S	1.3345e-06	0.00146247	0.00329815	-0.26	0.422754	n.d.	n.d.	n.d.	-	-
78	13.17	115	Creatinine	HMDB0000562	Amino acids	S	2.173e-05	0.0015101	0.00151049	0.22	0.339515	n.d.	n.d.	n.d.	-	-
80	13.369	73	Oxoglutaric acid	HMDB0000208	Keto acids	S	8.636e-06	0.000164471	0.000186052	-0.22	-0.0714117	n.d.	n.d.	n.d.	-	-
81	13.525	147	Erythronic acid	HMDB0000613	Sugar acids	S	1.1776e-05	4.3579e-05	3.691e-05	-0.39	-0.655851	n.d.	n.d.	n.d.	-	-
82	13.635	211	Glycerol-1-phosphate	HMDB0000126	Glycerolipids	S	7.873e-06	0.000146428	0.000103055	-0.12	-1.06382	n.d.	n.d.	n.d.	-	-
83	13.677	73	Hypotaurine	HMDB0000965	Others	S	3.187e-05	0.000109496	6.50216e-05	0.04	-1.15797	n.d.	n.d.	n.d.	-	-
84	13.859	217	D-Xylono-1,5-lactone	HMDB0011676	Lactones	S	0.00562383	1.6364e-05	3.286e-05	0.06	0.709957	n.d.	n.d.	n.d.	-	-
85	13.908	246	L-Glutamic acid	HMDB0000148	Amino acids	S	0.00562803	0.00492572	0.00234044	0.7	0.01	n.d.	n.d.	n.d.	-	-
86	13.995	120	L-Phenylalanine	HMDB0000159	Amino acids	S	0.000806688	0.00310584	0.00287562	-0.04	0	n.d.	n.d.	n.d.	-	-
87	14.016	102	Isopropyl decanoate	HMDB0061829	Fatty acids	S	6.84e-06	6.83341e-05	5.94346e-05	-0.09	-0.390961	n.d.	n.d.	n.d.	-	-
88	14.041	206	Acetaminophen	HMDB0001859	Phenols	S	3.728e-06	0.000395595	2.081e-06	0.01	-0.435439	n.d.	n.d.	n.d.	-	-
89	14.155	73	p-Hydroxyphenylacetic acid	HMDB0000020	Phenols	S	3.347e-05	4.895e-05	5.801e-05	-0.34	-0.0993553	n.d.	n.d.	n.d.	-	-
91	14.302	103	Pectin	HMDB0003402	Saccharides	S	2.85e-05	3.664e-05	8.90516e-05	-0.38	0.451776	n.d.	n.d.	n.d.	-	-
93	14.381	103	D-Ribose	HMDB0000283	Saccharides	S	8.93892e-05	8.7836e-05	0.00016667	-0.6	0.35446	n.d.	n.d.	n.d.	-	-
94	14.469	73	Taurine	HMDB0000251	Amino acids	S	0.000654012	0.0010307	0.000445042	0.14	-0.603167	n.d.	n.d.	n.d.	-	-
95	14.488	159	L-Asparagine	HMDB0000168	Amino acids	S	0.000147679	0.00193244	0.00167832	-0.14	0.641936	n.d.	n.d.	n.d.	-	-
96	14.555	73	D-Xylulose	HMDB0001644	Saccharides	S	0.000783125	0.000151545	0.000151351	0.02	-0.0600843	n.d.	n.d.	n.d.	-	-
97	14.605	115	3-Sulfinoalanine	HMDB0000996	Amino acids	S	0.000129486	0.000155395	0.000151634	0.38	0.159403	n.d.	n.d.	n.d.	-	-
98	14.829	73	Aminocaproic acid	HMDB0001901	Fatty acids	S	0.000812545	0.00037252	0.000333749	0.12	-0.252028	n.d.	n.d.	n.d.	-	-
100	15.033	217	Aminoadipic acid	HMDB0000510	Amino acids	S	0.000213617	0.000156259	0.000259559	-0.26	0.754223	n.d.	n.d.	n.d.	-	-
101	15.034	217	D-Xylitol	HMDB0002917	Sugar alcohols	S	0.00562538	0.000149297	0.000297908	-0.46	0.822477	n.d.	n.d.	n.d.	-	-
103	15.107	147	Quinolinic acid	HMDB0000232	Carboxylic acids	S	0.00194043	6.314e-05	8.19353e-05	-0.46	0.37763	n.d.	n.d.	n.d.	-	-
104	15.277	217	Uridine diphosphate glucuronic acid	HMDB0000935	Pyrimidine nucleosides	S	8.183e-05	0.000299441	0.000275087	-0.2	-0.512256	n.d.	n.d.	n.d.	-	-
105	15.527	103	Diglycerol	CID42953	Sugar alcohols	S	9.86e-05	5.049e-05	4.66e-05	0.08	-0.224732	n.d.	n.d.	n.d.	-	-
107	15.646	173	L-Glutamine	HMDB0000641	Amino acids	S	8.79e-05	0.0120879	0.0133032	-0.02	-0.33696	n.d.	n.d.	n.d.	-	-
108	15.664	355	Gentisic acid	HMDB0000152	Carboxylic acids	S	6.712e-06	3.775e-06	1.5575e-05	-0.64	0.849817	n.d.	n.d.	n.d.	-	-
109	15.701	292	​D-Xylonic acid	HMDB0059750	Sugar acids	S	1.6042e-05	1.921e-05	4.479e-05	-0.56	0.75687	n.d.	n.d.	n.d.	-	-
110	15.734	299	O-Phosphoethanolamine	HMDB0000224	Amines	S	1.451e-05	2.388e-05	8.02e-06	0.24	-0.685835	n.d.	n.d.	n.d.	-	-
111	15.983	96	1-Methylhistidine	HMDB0000001	Amino acids	S	8.44278e-05	7.83693e-05	0.000115423	-0.08	0.957695	n.d.	n.d.	n.d.	-	-
112	15.994	265	Hypoxanthine	HMDB0000157	Purine derivatives	S	0.000299872	0.000503971	0.000145717	0.76	-0.574402	n.d.	n.d.	n.d.	-	-
113	16.044	174	Glycyl-glycine	HMDB0011733	Amino acids	S	6.882e-06	0.00039686	0.00013348	0.22	-0.377571	n.d.	n.d.	n.d.	-	-
115	16.126	174	Ornithine	HMDB0000214	Amino acids	S	0.000585023	0.00383806	0.00384126	0.08	0.243515	n.d.	n.d.	n.d.	-	-
116	16.183	204	Shikimic acid	HMDB0003070	Carboxylic acids	S	3.354e-05	4.74556e-05	2.1375e-05	-0.3	-0.499303	n.d.	n.d.	n.d.	-	-
117	16.205	128	Methionine sulfone	HMDB0062174	Amino acids	S	1.2085e-05	3.76849e-05	1.74e-05	0.34	-0.01	n.d.	n.d.	n.d.	-	-
118	16.378	73	Sebacic acid	HMDB0000792	Carboxylic acids	S	2.16001e-08	0.000156761	0.000158725	-0.3	-0.599314	n.d.	n.d.	n.d.	-	-
119	16.401	105	Hippuric acid	HMDB0000714	Carboxylic acids	S	0.000519953	0.000175087	0.00022649	-0.26	0	n.d.	n.d.	n.d.	-	-
120	16.423	173	Dehydroascorbic acid	HMDB0001264	Lactones	S	0.000196439	9.43628e-05	9.6127e-05	-0.26	0.278867	n.d.	n.d.	n.d.	-	-
121	16.482	147	1,5-Anhydrosorbitol	HMDB0002712	Saccharides	S	0.000174083	0.00581073	0.00511513	0.4	0.481311	n.d.	n.d.	n.d.	-	-
123	16.546	147	Quinic acid	HMDB0003072	Others	S	0.000146978	5.60147e-05	0.0001073	-0.24	0.873496	n.d.	n.d.	n.d.	-	-
125	16.671	103	D-Psicose	CID441036	Saccharides	S	0.000226934	0.00060396	0.000603694	0.08	0.253666	n.d.	n.d.	n.d.	-	-
127	16.767	73	D-Mannose	HMDB0000169	Saccharides	S	2.6521e-05	0.000428096	0.000581013	-0.1	0.311325	n.d.	n.d.	n.d.	-	-
128	16.774	103	D-Tagatose	HMDB0003418	Saccharides	S	8.56027e-05	0.00092006	0.00110103	0.04	0.263613	n.d.	n.d.	n.d.	-	-
129	16.95	319	Allose	HMDB0001151	Saccharides	S	4.262e-06	0.0225955	0.0231927	-0.34	-0.163374	n.d.	n.d.	n.d.	-	-
130	17.181	154	L-Histidine	HMDB0000177	Amino acids	S	7.996e-06	0.0259235	0.0284188	-0.12	0.225862	n.d.	n.d.	n.d.	-	-
131	17.226	174	L-Lysine	HMDB0000182	Amino acids	S	0.000145565	0.00892605	0.008181	-0.04	-0.583351	n.d.	n.d.	n.d.	-	-
133	17.289	147	Sorbitol	HMDB0000247	Sugar alcohols	S	2.806e-05	0.0030093	0.000289124	-0.22	-0.468681	n.d.	n.d.	n.d.	-	-
134	17.298	74	Methyl hexadecanoic acid	HMDB0061859	Fatty acids	S	1.2837e-05	0.000835094	0.000473327	-0.04	-0.437117	n.d.	n.d.	n.d.	-	-
135	17.388	218	L-Tyrosine	HMDB0000158	Amino acids	S	0.000140561	0.0113343	0.0110601	-0.32	-0.458815	n.d.	n.d.	n.d.	-	-
136	17.49	147	D-Galacturonic acid	HMDB0002545	Sugar acids	S	3.174e-05	0.000702364	0.000572949	-0.16	-0.788847	n.d.	n.d.	n.d.	-	-
137	17.501	117	Pentadecanoic acid	HMDB0000826	Fatty acids	S	6.415e-06	0.000187832	0.000166025	0.12	-0.436062	n.d.	n.d.	n.d.	-	-
138	17.594	237	Paraxanthine	HMDB0001860	Purine derivatives	S	2.3504e-05	0.000132086	0.00042573	-0.62	0.456305	n.d.	n.d.	n.d.	-	-
139	17.62	202	Indoleacetic acid	HMDB0000197	Others	S	0.00367129	0.000207238	0.000258247	-0.36	0.436562	n.d.	n.d.	n.d.	-	-
142	17.935	147	Galactonic acid	HMDB0000565	Hydroxy acids	S	0.000820351	2.874e-05	4.91e-05	-0.1	0.706609	n.d.	n.d.	n.d.	-	-
143	17.975	147	Gluconic acid	HMDB0000625	Sugar acids	S	0.000273785	8.03652e-05	8.27354e-05	-0.06	-0.03	n.d.	n.d.	n.d.	-	-
144	18.136	147	Xanthine	HMDB0000292	Purine derivatives	S	0.0218173	3.472e-05	2.01e-05	0.66	-0.407475	n.d.	n.d.	n.d.	-	-
145	18.238	147	Conduritol B Epoxide	CID9989541	Others	S	0.00041503	0.00060904	0.00043215	-0.1	-0.400788	n.d.	n.d.	n.d.	-	-
146	18.238	147	Galactitol	HMDB0000107	Sugar alcohols	S	0.0207331	0.000608419	0.000431178	-0.1	-0.400562	n.d.	n.d.	n.d.	-	-
147	18.267	117	Palmitoleic acid	HMDB0003229	Fatty acids	S	0.000154464	0.00110671	0.000312251	0.56	-0.0510064	n.d.	n.d.	n.d.	-	-
149	18.635	206	Salicyluric acid	HMDB0000840	Carboxylic acids	S	0.0104828	4.142e-06	5.17093e-05	-0.36	0.0902274	n.d.	n.d.	n.d.	-	-
150	18.85	217	Inositol	HMDB0000211	Sugar alcohols	S	0.0566965	0.00202774	0.00256596	-0.4	0.1	n.d.	n.d.	n.d.	-	-
152	18.924	147	Uric acid	HMDB0000289	Purine derivatives	S	4.599e-06	0.00170699	0.00250044	-0.02	0.691879	n.d.	n.d.	n.d.	-	-
153	19.014	73	N-Acetyl-D-glucosamine	HMDB0000215	Saccharides	S	0.000137409	0.00228577	0.00156175	0.2	-0.305175	n.d.	n.d.	n.d.	-	-
154	19.244	74	Methyl stearate	HMDB0034154	Fatty acids	S	0	0.000205717	0.000177022	0.02	-0.383389	n.d.	n.d.	n.d.	-	-
155	19.29	147	N-acetyl-d-hexosamine	CID439916	Amines	S	6.214e-05	1.3021e-05	1.69e-05	-0.57	0	n.d.	n.d.	n.d.	-	-
156	19.401	117	Heptadecanoic acid	HMDB0002259	Fatty acids	S	3.846e-05	0.00031424	0.000277096	0.14	-0.531781	n.d.	n.d.	n.d.	-	-
157	19.508	97	Octadecanol	HMDB0002350	Fatty alcohols	S	0.000682175	9.19474e-05	8.87615e-05	0.16	0.0902197	n.d.	n.d.	n.d.	-	-
158	19.794	192	L-Kynurenine	HMDB0000684	Amino acids	S	7.682e-06	3.425e-05	4.524e-05	-0.28	0.4493	n.d.	n.d.	n.d.	-	-
159	19.807	174	Tryptamine	HMDB0000303	Amines	S	4.617e-06	8.03321e-05	8.46697e-05	-0.3	-0.669894	n.d.	n.d.	n.d.	-	-
161	19.999	218	L-Tryptophan	HMDB0000929	Amino acids	S	0.000103326	0.00504183	0.00526839	-0.4	-0.179035	n.d.	n.d.	n.d.	-	-
165	20.439	100	L-Cysteine	HMDB0000574	Amino acids	S	0.0153957	0.000669719	0.000745582	-0.32	-0.0814661	n.d.	n.d.	n.d.	-	-
166	20.693	73	L-Cystine	HMDB0000192	Amino acids	S	0.0112969	0.0007251	0.000564268	-0.08	-0.688544	n.d.	n.d.	n.d.	-	-
167	20.839	204	Galactosylglycerol	HMDB0006790	Glycerolipids	S	0.000135302	1.6863e-05	5.2279e-05	-0.12	0.851831	n.d.	n.d.	n.d.	-	-
168	21.017	217	Pseudouridine	HMDB0000767	Pyrimidine nucleosides	S	0.0083981	0.000216023	0.00019234	0.24	0.0970121	n.d.	n.d.	n.d.	-	-
169	21.363	91	Arachidonic acid	HMDB0001043	Fatty acids	S	0	0.000186877	0.000153015	0.46	-0.180748	n.d.	n.d.	n.d.	-	-
170	21.546	73	16-Hydroxy hexadecanoic acid	HMDB0006294	Fatty acids	S	2.586e-05	0.000312802	0.00028172	-0.06	-0.499488	n.d.	n.d.	n.d.	-	-
171	21.741	131	Oleamide	HMDB0002117	Fatty acids	S	0.00306887	0.000176964	1.715e-05	0.54	-0.814883	n.d.	n.d.	n.d.	-	-
172	21.759	117	Eicosenoic acid	HMDB0002231	Fatty acids	S	2.353e-06	6.01398e-05	2.181e-05	0.58	-0.681286	n.d.	n.d.	n.d.	-	-
173	21.927	192	4-Aminohippuric acid	HMDB0001867	Fatty acids	S	0.000548028	2.93997e-05	2.1669e-06	0.34	-0.344822	n.d.	n.d.	n.d.	-	-
174	21.968	117	Eicosanoic acid	HMDB0002212	Fatty acids	S	0.000242231	0.000342225	0.000302384	0.34	-0.442613	n.d.	n.d.	n.d.	-	-
175	21.979	217	Uridine	HMDB0000296	Pyrimidine nucleosides	S	0.000214367	0.000404329	0.000278182	0.36	-0.690511	n.d.	n.d.	n.d.	-	-
176	22.095	174	Serotonin	HMDB0000259	Amines	S	0.000287876	6.70717e-05	0.000106085	-0.6	-0.814421	n.d.	n.d.	n.d.	-	-
178	22.887	91	Docosahexaenoic acid	HMDB0002183	Fatty acids	S	8.461e-05	9.48142e-05	7.90968e-05	0.25	-0.404202	n.d.	n.d.	n.d.	-	-
179	22.965	217	Inosine	HMDB0000195	Purine nucleosides	S	0.00268847	8.10538e-05	0.000427669	-1	-0.683386	n.d.	n.d.	n.d.	-	-
181	23.361	147	N-Acetylneuraminic acid	HMDB0000230	Sugar acids	S	4.095e-05	7.569e-06	5.082e-06	-0.04	-0.53815	n.d.	n.d.	n.d.	-	-
182	23.459	230	Adenosine	HMDB0000050	Purine nucleosides	S	0.0314307	5.18545e-05	5.74422e-05	-0.89	-0.648089	n.d.	n.d.	n.d.	-	-
184	23.853	73	Alpha-Lactose	HMDB0000186	Saccharides	S	3.22548e-05	4.71894e-05	6.99378e-05	-0.4	-0.2976	n.d.	n.d.	n.d.	-	-
185	23.857	73	D-Maltose	HMDB0000163	Saccharides	S	1.0425e-05	4.557e-05	2.8829e-05	0.37	0.232776	n.d.	n.d.	n.d.	-	-
186	24.269	73	Trehalose	HMDB0000975	Saccharides	S	0.0101307	4.27332e-05	4.98716e-05	-0.28	0.01	n.d.	n.d.	n.d.	-	-
188	24.421	204	Beta-Lactose	HMDB0041627	Saccharides	S	0.00104254	2.1617e-05	9.821e-06	0.64	0.133662	n.d.	n.d.	n.d.	-	-
189	24.427	147	Lactitol	HMDB0040937	Sugar alcohols	S	0.000153225	1.5204e-05	1.1786e-05	0.36	0.147441	n.d.	n.d.	n.d.	-	-
190	24.445	103	Guanosine	HMDB0000133	Purine nucleosides	S	0.000112667	8.2693e-06	7.164e-06	0.05	0.14026	n.d.	n.d.	n.d.	-	-
192	24.875	147	Acetaminophen glucuronide	HMDB0010316	Saccharides	S	3.0469e-07	1.87e-05	1.203e-05	0.01	-0.594727	n.d.	n.d.	n.d.	-	-
193	26.219	223	Gamma-Tocopherol	HMDB0001492	Sterols	S	2.42e-07	0.000331975	9.99957e-05	-0.12	-0.421958	n.d.	n.d.	n.d.	-	-
194	27.569	73	Alpha-Tocopherol	HMDB01893	Sterols	S	1.5544e-05	0.000602635	0.000758015	-0.48	-0.286445	n.d.	n.d.	n.d.	-	-
